# Supplementary material for: Unraveling Spurious Properties of Interaction Networks with Tailored Random Networks
Source: PubMed Central journal article supplement (PMC3151270; doi:10.1371/journal.pone.0022826), 2011-08-05
Supplement: pone.0022826.s001.pdf [file pone.0022826.s001.pdf]

# Text Supplementary 1 – Unraveling Spurious Properties of Interaction Networks with Tailored Random Networks

Stephan Bialonski<sup>1,2,3,\*</sup>, Martin Wendler<sup>4</sup>, Klaus Lehnertz<sup>1,2,3</sup>

1 Department of Epileptology, University of Bonn, Bonn, Germany

2 Helmholtz Institute for Radiation and Nuclear Physics, University of Bonn, Bonn, Germany

3 Interdisciplinary Center for Complex Systems, University of Bonn, Bonn, Germany

4 Fakultät für Mathematik, Ruhr-Universität Bochum, Bochum, Germany

\* E-mail: bialonski@gmx.net

## Lemma 1

For every  $i, j \in \{1, \dots, N\}$  with  $i \neq j$ , we have the following limit of the probability distribution of the empirical correlation:

$$P \left( \sqrt{\frac{T}{g(M)}} \text{corr}(x_{i,M,T}, x_{j,M,T}) \leq x \right) \rightarrow \Phi(x) \quad \text{with } g(M) = \frac{2}{3}M + \frac{1}{3} \frac{1}{M} \quad (1)$$

as  $T \rightarrow \infty$ , where  $\Phi$  denotes the cumulative distribution function of a standard normal random variable.

## Proof

In order to simplify the presentation, we write  $y_{i,M,T}(t) = x_{i,M,T}(t) - \frac{1}{2}$ , so that  $Ey_{i,M,T}(t) = 0$ . First note that  $y_{i,M,T}(t)$  is a  $M$ -dependent sequence, i.e. for  $|s - t| > M$ ,  $y_{i,M,T}(s)$  and  $y_{i,M,T}(t)$  are independent. So we have that the covariance

$$\text{Cov} (y_{i,M,T}(1)y_{j,M,T}(1), y_{i,M,T}(t)y_{j,M,T}(t)) = 0 \quad \text{for } T > M.$$

Additionally,

$$\begin{aligned} \text{Cov} (y_{i,M,T}(1)y_{j,M,T}(1), y_{i,M,T}(t)y_{j,M,T}(t)) = \\ \text{Cov} (y_{i,M,T}(1), y_{i,M,T}(t)) \text{Cov} (y_{j,M,T}(1), y_{j,M,T}(t)) \end{aligned} \quad (2)$$

and  $\text{Cov}(z_i(s), z_i(t)) = \text{Var}(z_i(1))$  if  $s = t$  and otherwise  $\text{Cov}(z_i(s), z_i(t)) = 0$ . For  $1 \leq t \leq M$ , we obtain by the definition of the moving average and the independence of the underlying process  $z_j(t)$ ,  $t \in \mathbb{N}$  that

$$\text{Cov}(y_{i,M,T}(1)y_{j,M,T}(1), y_{i,M,T}(t)y_{j,M,T}(t)) = \frac{1}{M^4} \left( \sum_{s=1}^{M-(t-1)} \text{Var}(z_j(s)) \right)^2 \quad (3)$$

$$= \frac{1}{M^4} (M - (t - 1))^2 \text{Var}^2(z_i(1)). \quad (4)$$

By the central limit theorem for  $M$ -dependent random variables, see reference [1],

$$\frac{1}{\sqrt{\text{Var}\left(\frac{1}{T} \sum_{t=1}^T y_{i,M,T}(t)y_{j,M,T}(t)\right)}} \frac{1}{T} \sum_{t=1}^T y_{i,M,T}(t)y_{j,M,T}(t) \quad (5)$$

converges in distribution to a standard normal random variable as  $T \rightarrow \infty$ . Furthermore, we have the following convergence for the variance as  $T \rightarrow \infty$ :

$$\begin{aligned} T\text{Var}\left(\frac{1}{T} \sum_{t=1}^T y_{i,M,T}(t)y_{j,M,T}(t)\right) \\ \rightarrow \text{Var}(y_{i,M,T}(1)y_{j,M,T}(1)) + 2 \sum_{t=2}^M \text{Cov}(y_{i,M,T}(1)y_{j,M,T}(1), y_{i,M,T}(t)y_{j,M,T}(t)) \\ = \left( \frac{1}{M^2} + \frac{2}{M^4} \sum_{t=2}^M (M - (t - 1))^2 \right) \text{Var}^2(z_i(1)) = \frac{g(M)}{M^2} \text{Var}^2(z_i(1)). \quad (6) \end{aligned}$$

The last equality follows easily by  $\sum_{i=1}^n i^2 = \frac{n(n+1)(2n+1)}{6}$ . With the same central limit theorem,  $\frac{1}{\sqrt{T}} \sum_{t=1}^T y_{i,M,T}(t)$  converges to a normal limit, so  $\frac{1}{T^{\frac{3}{4}}} \sum_{t=1}^T y_{i,M,T}(t) \rightarrow 0$  in probability and consequently

$$\begin{aligned} \sqrt{T} \left( \frac{1}{T} \sum_{t=1}^T y_{i,M,T}(t) \right) \left( \frac{1}{T} \sum_{t=1}^T y_{j,M,T}(t) \right) = \\ \left( \frac{1}{T^{\frac{3}{4}}} \sum_{t=1}^T y_{i,M,T}(t) \right) \left( \frac{1}{T^{\frac{3}{4}}} \sum_{t=1}^T y_{j,M,T}(t) \right) \rightarrow 0 \quad (7) \end{aligned}$$

in probability as  $T \rightarrow \infty$ . By similar arguments, we have that  $\frac{1}{T} \sum_{t=1}^T y_{i,M,T}^2(t) \rightarrow \text{Var}(y_{i,M,T}(1)) = \frac{1}{M} \text{Var}(z_i(1))$  and  $\frac{1}{T} \sum_{t=1}^T y_{i,M,T}(t) \rightarrow 0$ , so we get

$$\begin{aligned} \frac{1}{T} \sum_{t=1}^T (y_{i,M,T}(t) - \bar{y}_{i,M,T})^2 &= \frac{1}{T} \sum_{t=1}^T y_{i,M,T}^2(t) - \left( \frac{1}{T} \sum_{t=1}^T y_{i,M,T}(t) \right)^2 \\ &\rightarrow \text{Var}(y_{i,M,T}(1)) = \frac{1}{M} \text{Var}(z_i(1)). \end{aligned} \quad (8)$$

By Slutsky's theorem [2] and with (5), (6), (7), and (8), we finally obtain that

$$\begin{aligned} &\sqrt{\frac{T}{g(M)}} \text{corr}(x_{i,M,T}, x_{j,M,T}) \\ &= \frac{\sqrt{T} \frac{1}{T} \sum_{t=1}^T y_{i,M,T}(t) y_{j,M,T}(t) - \sqrt{T} \left( \frac{1}{T} \sum_{t=1}^T y_{i,M,T}(t) \right) \left( \frac{1}{T} \sum_{t=1}^T y_{j,M,T}(t) \right)}{\sqrt{g(M) \frac{1}{T} \sum_{t=1}^T (y_{i,M,T}(t) - \bar{y}_{i,M,T})^2 \frac{1}{T} \sum_{t=1}^T (y_{j,M,T}(t) - \bar{y}_{j,M,T})^2}} \end{aligned} \quad (9)$$

converges in distribution to a standard normal random variable as  $T \rightarrow \infty$ . This completes the proof.

## Lemma 2

For  $T \rightarrow \infty, R \rightarrow \infty$

$$\hat{\epsilon} \left( \frac{\theta}{\sqrt{T_{\text{eff}}(M)}}, M, T \right) \rightarrow 2\Phi(-\theta) \quad (10)$$

in probability with  $T_{\text{eff}}(M) = \frac{T}{g(M)}$ .

## Proof

With Lemma 1, we have that

$$\begin{aligned} E \left[ H_{ij,M,T}^{(r)} \left( \frac{\theta}{\sqrt{T_{\text{eff}}(M)}} \right) \right] &= P \left( \rho_{ij,M,T} > \frac{\theta}{\sqrt{T_{\text{eff}}(M)}} \right) \\ &= P \left( \text{corr}(x_{i,M,T}, x_{j,M,T}) > \frac{\theta}{\sqrt{T_{\text{eff}}(M)}} \right) + P \left( \text{corr}(x_{i,M,T}, x_{j,M,T}) < \frac{-\theta}{\sqrt{T_{\text{eff}}(M)}} \right) \\ &= P \left( \sqrt{\frac{T}{g(M)}} \rho_{ij,M,T} > \theta \right) + P \left( \sqrt{\frac{T}{g(M)}} \rho_{ij,M,T} < -\theta \right) \rightarrow 2\Phi(-\theta) \end{aligned}$$

as  $T \rightarrow \infty$ . Furthermore,  $H_{ij,M,T}^{(r)}$  is bounded by 0 and 1, so  $\text{Var} \left( H_{ij,M,T}^{(r)} \right) \leq \frac{1}{4}$ . By the independence of the  $R$  random networks

$$\text{Var} \left( \hat{\epsilon} \left( \frac{\theta}{\sqrt{T_{\text{eff}}(M)}}, M, T \right) \right) = \frac{1}{R^2} \sum_{r=1}^R \text{Var} \left( H_{ij,M,T}^{(r)} \left( \frac{\theta}{\sqrt{T_{\text{eff}}(M)}} \right) \right) \leq \frac{1}{4R} \rightarrow 0 \quad (11)$$

as  $R \rightarrow \infty$ . The lemma follows with the Chebyshev inequality.

## References

1. Hoeffding W, Robbins H (1948) The central limit theorem for dependent random variables. *Duke Math J* 15: 773–780.
2. Slutsky E (1925) Über stochastische Asymptoten und Grenzwerte (in german). *Metron* 5: 3–89.
